# Supplementary material for: The disruption of the CCDC6 – PP4 axis induces a BRCAness like phenotype and sensitivity to PARP inhibitors in high-grade serous ovarian carcinoma
Source: PubMed Central journal article supplement (PMC9375931; doi:10.1186/s13046-022-02459-2), 2022-08-13

**Table S1**

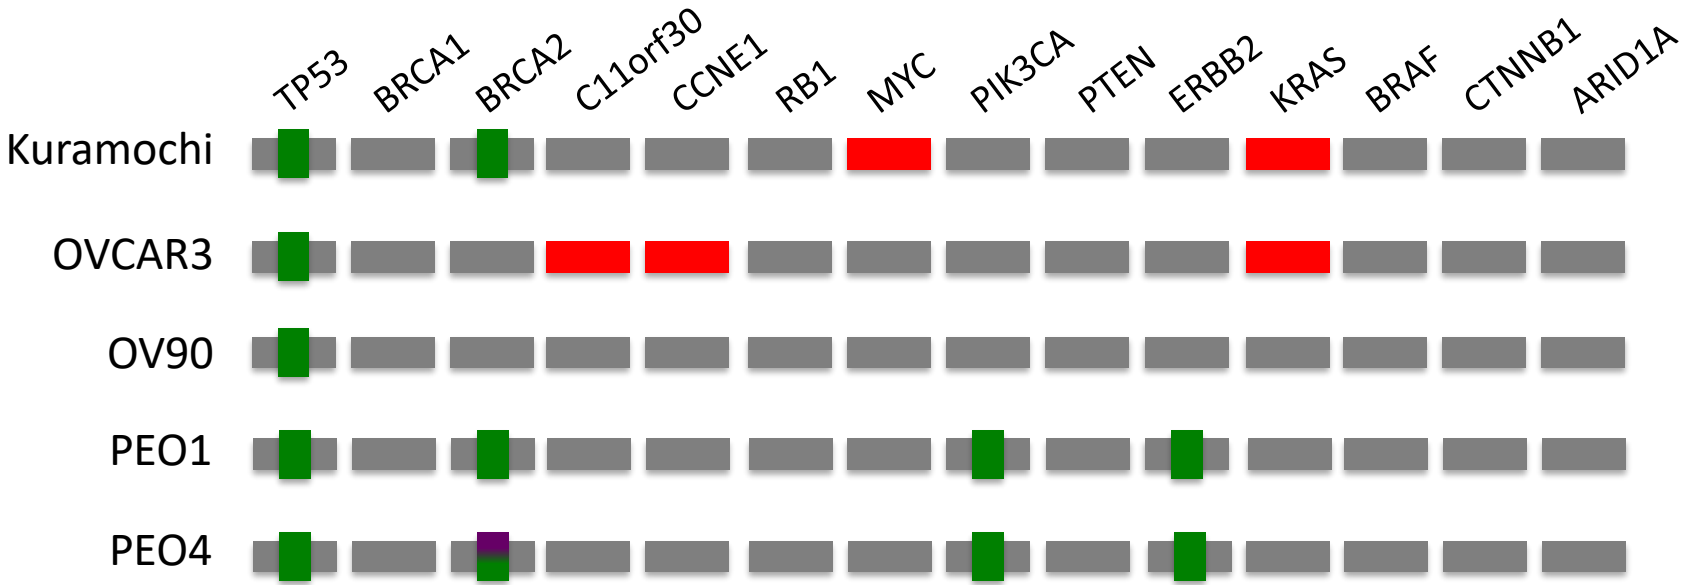

Alterations

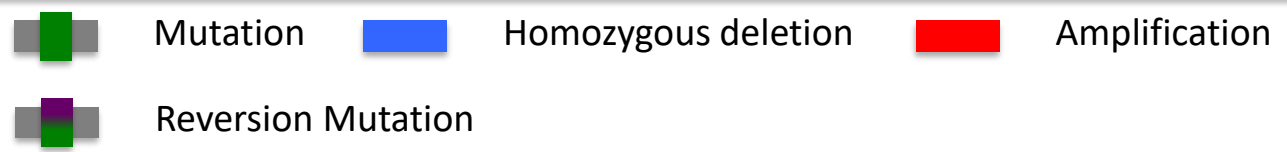

Supplement: 13046_2022_2459_MOESM1_ESM.pdf [file 13046_2022_2459_MOESM1_ESM.pdf]
