# Supplementary material for: The disruption of the CCDC6 – PP4 axis induces a BRCAness like phenotype and sensitivity to PARP inhibitors in high-grade serous ovarian carcinoma
Source: PubMed Central journal article supplement (PMC9375931; doi:10.1186/s13046-022-02459-2), 2022-08-13
Supplement: 13046_2022_2459_MOESM4_ESM.pdf [file 13046_2022_2459_MOESM4_ESM.pdf]

**Table S3**

| N=251                         |             |
|-------------------------------|-------------|
| <b>Age elderly, n(%)</b>      |             |
| <65                           | 220 (87.6%) |
| ≥65                           | 31 (12.4%)  |
| <b>Tumor histology, n(%)</b>  |             |
| High Grade Serous             | 159 (63.3%) |
| Other                         | 81 (32.2%)  |
| unk                           | 11 (4.4%)   |
| <b>FIGO stage, n(%)</b>       |             |
| I                             | 21 (8.4%)   |
| II                            | 20 (8.0%)   |
| III                           | 171 (68.1%) |
| IV                            | 39 (15.5%)  |
| <b>ECOG PS , n(%)</b>         |             |
| 0-1                           | 243 (96.8%) |
| 2                             | 8 (3.2%)    |
| <b>Residual disease, n(%)</b> |             |
| None                          | 96 (38.2%)  |
| ≤ 1 cm                        | 52 (20.7%)  |
| > 1 cm                        | 71 (28.3%)  |
| Not operated                  | 32 (12.7%)  |
| <b>Treatment, n(%)</b>        |             |
| Carbo-TXL                     | 110 (43.8%) |
| Carbo-PLD                     | 141 (56.2%) |

---

Summary table of the study population of ovarian cancers tested for CCDC6 protein expression.
